# Supplementary material for: CpG incorporated DNA microparticles for elevated immune stimulation for antigen presenting cells
Source: Royal Society of Chemistry journal article supplement (doi:10.1039/c7ra13293j), 2018-01-01
Supplement: c7ra13293j1.pdf [file c7ra13293j1.pdf]

Supporting Information

**CpG Incorporated DNA Microparticles  
for Elevated Immune Stimulation for Antigen Presenting Cells**

*Heejung Jung<sup>1§</sup>, Dajeong Kim<sup>2§</sup>, Yoon Young Kang<sup>1</sup>, Hyejin Kim<sup>2</sup>, Jong Bum Lee<sup>2\*</sup>, and Hyejung Mok<sup>1\*</sup>*

<sup>1</sup> Department of Bioscience and Biotechnology, Konkuk University, 120 Neungdong-ro, Gwangjin-gu, Seoul 05029, Republic of Korea

<sup>2</sup> Department of Chemical Engineering, University of Seoul, 163 Seoulsiripdaero, Dongdaemun-gu, Seoul 02504, Republic of Korea

§ The authors are equally contributed.

\* Corresponding authors

tel: +82-2-450-0448, e-mail: [hjmok@konkuk.ac.kr](mailto:hjmok@konkuk.ac.kr)

tel: +82-2-450-0448, e-mail: [jblee@uos.ac.kr](mailto:jblee@uos.ac.kr)

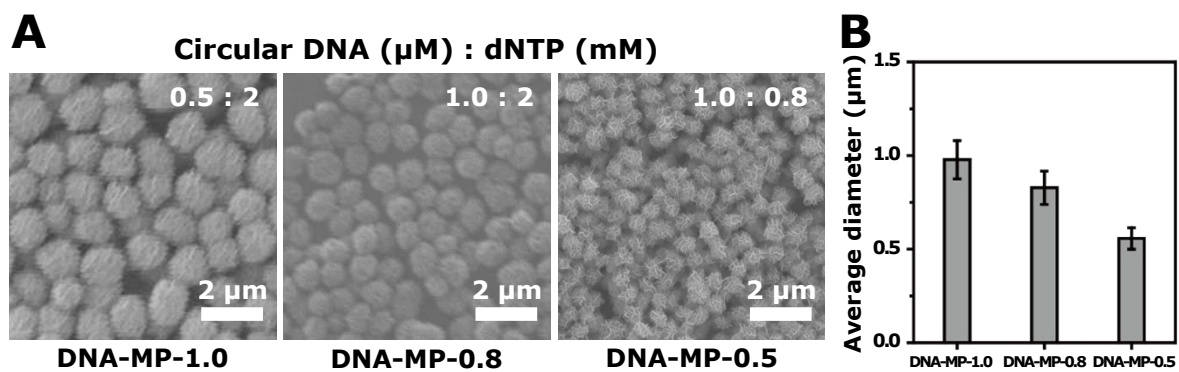

**Fig. S1** A) SEM images and B) Average diameter of CpG-based DNA-MPs including DNA-MP-0.5, DNA-MP-0.8, and DNA-MP-1.0 prepared at different circular DNA: dNTP ratios.

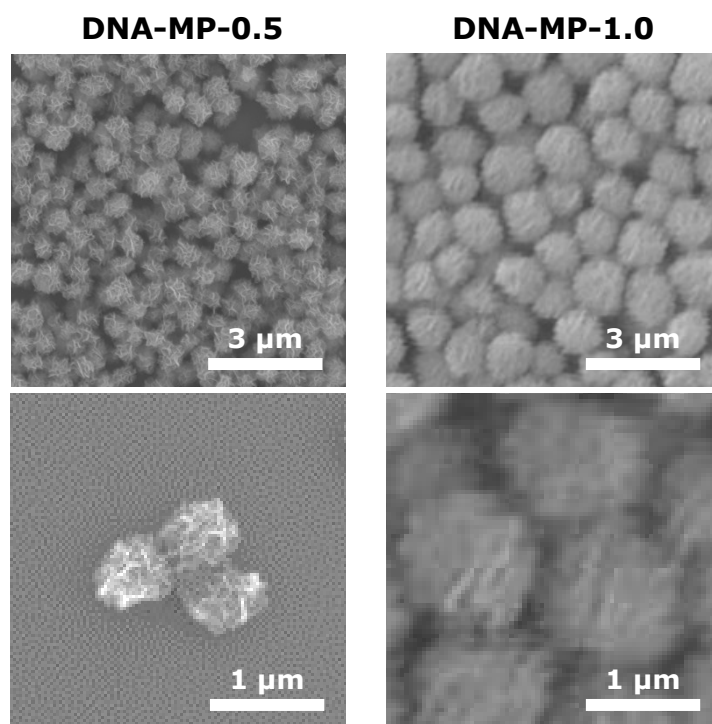

**Fig. S2** SEM images of GpC-based DNA-MPs including DNA-MP-0.5 and DNA-MP-1.0.

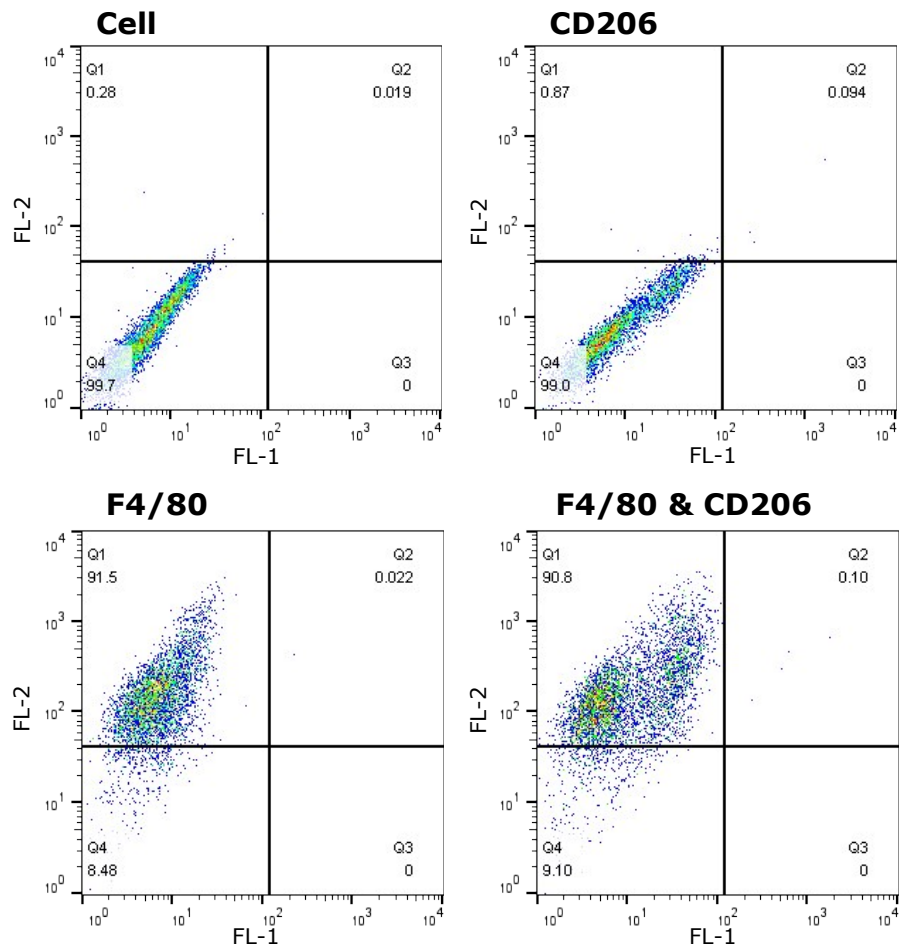

**Fig. S3** FACS analysis of BMDMs after staining with PE-labeled F4/80 antibody and FITC-labeled CD-206 antibody.

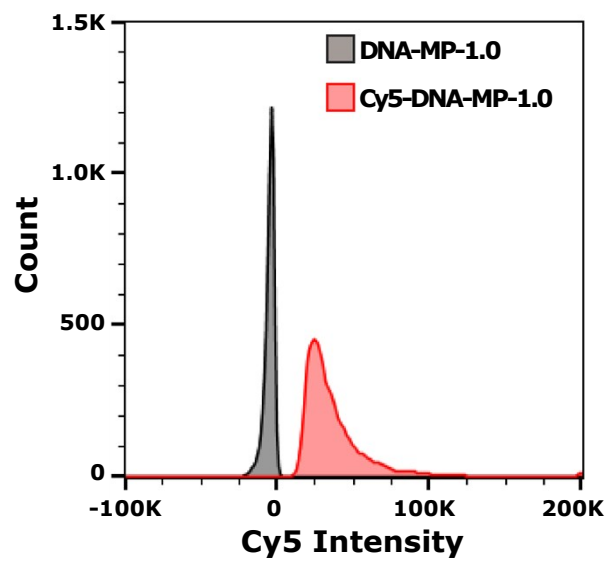

**Fig. S4** Fluorescence intensities of Cy5 labeled DNA-MP-1.0, compared to non-labeled DNA-MP-1.0.

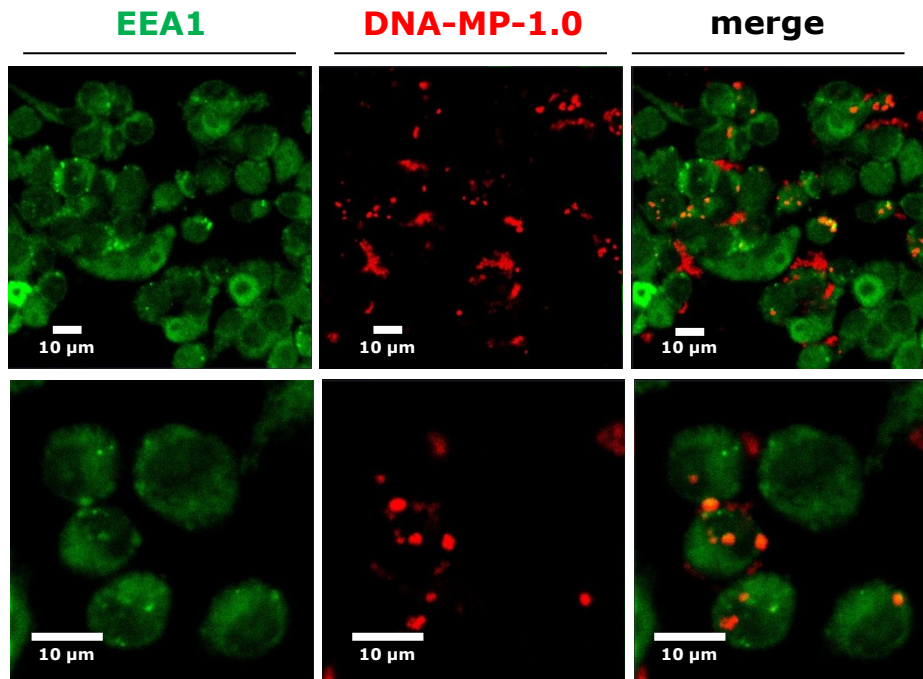

**Fig. S5** Confocal microscopy images of cells treated with Cy5 labeled DNA-MP-1.0 after staining early endosome as well as early phagosome using FITC-labeled EEA1 antibodies.

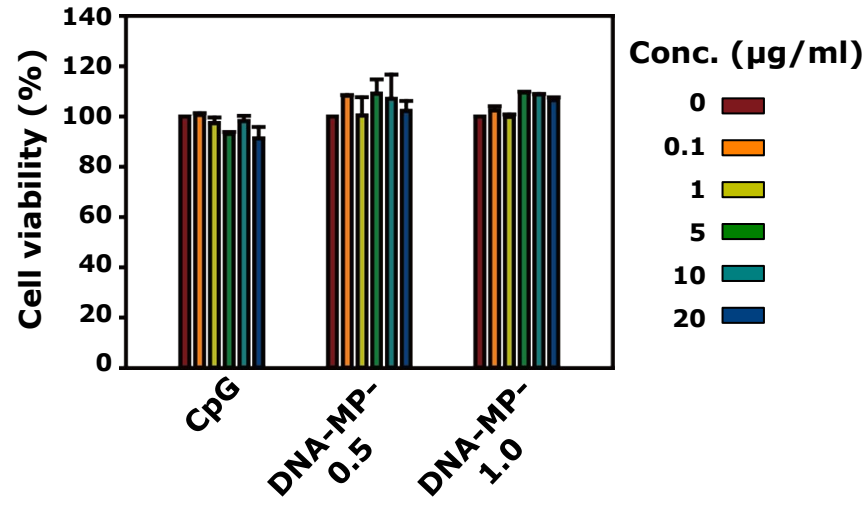

**Fig. S6** Cell viability of DNA-MP-0.5 and DNA-MP-1.0 at different concentrations for RAW 264.7 cells.
